# Supplementary material for: Lactobacillus reuteri TSR332 and Lactobacillus fermentum TSF331 stabilize serum uric acid levels and prevent hyperuricemia in rats
Source: PeerJ. 2021 May 3;9:e11209. doi: 10.7717/peerj.11209 (PMC8101448; doi:10.7717/peerj.11209)
Supplement: Supplemental Information 1 — (1) Preliminary tests of TSF331, TSR332, and La322 in hyperuricemic rats. (2) Pretreatment and treatment effects of TSR332 in hyperuricemic rats. (3) UA, body weight, and kidney function in severe hyperuricemic rats. (5) In vitro purine assimilation assays of inosine and guanosine in probiotic strains. [file peerj-09-11209-s001.xlsx]

## Sheet: 工作表1
		Supplementary Table S1. Preliminary tests of TSF331, TSR332, and La322 in hyperuricemic rats.
		Day 0					Day 8
		Blank	HP	TSF331	TSR332	La322	Blank	HP	TSF331	TSR332	La322
		1.457	1.5	1.35	1.583	1.322	1.857	4.986	3.567	1.924	4.623
		1.03	0.965	1.212	1.071	1.213	1.41	4.537	3.351	1.46	4.431
		1.885	2.035	1.488	2.094	1.431	2.304	5.435	3.783	2.382	4.81
		1.894	1.798	1.337	1.222	1.258	1.699	4.073	3.548	2.129	4.7
		1.904	1.688	1.224	1.441	1.214	2.258	4.388	3.646	1.989	4.762
		0.909	1.075	1.44	1.51	1.419	2.015	5.034	3.692	1.685	4.543
		1.717	1.449	1.457	1.896	1.451	1.621	5.517	3.81	2.175	4.206
		1.134	0.976	1.292	0.967	1.228	1.728	4.669	3.372	1.986	4.268
		Supplementary Table S2. Preventive and therapeutic effects of TSR332 in hyperuricemic rats
		Day 0					Day 7					Day14
		Blank	HP	Pre	Tre	Pro	Blank	HP	Pre	Tre	Pro	Blank	HP	Pre	Tre	Pro
		1.715	2.535	2.662	2.309	1.812	2.059	3.632	2.125	2.777	2.485	1.563	4.32	2.251	2.155	2.265
		1.443	1.76	2.021	1.563	2.422	1.766	1.899	1.906	2.964	2.174	1.475	3.98	2.827	1.89	1.822
		1.365	1.991	2.115	2.028	1.72	2.096	2.883	1.531	2.498	3.064	1.654	2.63	2.369	1.794	2.394
		1.844	2.249	1.245	1.501	1.332	2.137	4.022	2.036	2.828	2.094	2.382	4.593	2.252	2.314	2.267
		1.545	1.437	1.536	1.868	2.371	1.611	3.712	1.819	2.668	2.546	1.864	3.683	2.225	2.421	3.024
		1.613	1.882	1.414	1.552	1.995	1.419	3.369	2.081	2.129	2.198	1.7	2.878	2.677	2.894	2.172
		1.59	1.813	1.851	2.094	2.024	1.403	3.784	2.052	3.626	2.355	1.623	2.817	2.276	2.244	2.668
		1.446	2.068	1.748	1.704	1.781	2.308	3.083	2.004	2.917	2.448	0.77	3.846	2.819	2.222	1.964
		Supplementary Table S3. UA, body weight, and kidney function in severe hyperuricemic rats.
		3.1. UA
		Day 0			Day 7			Day 14
		Blank	HP	TSR332	Blank	HP	TSR332	Blank	HP	TSR332
		1.594	1.715	1.225	1.871	3.756	2.304	2.042	3.799	2.66
		1.228	2.099	2.342	2.179	3.97	2.35	2.261	3.521	2.093
		1.667	1.874	2.218	1.932	3.27	2.716	1.46	3.125	2.376
		1.729	1.838	3.102	1.536	4.123	2.588	1.457	3.407	2.416
		1.549	1.459	1.995	2.133	3.457	2.356	1.721	3.89	2.029
		1.702	2.335	1.652	2.107	3.97	2.53	1.221	3.747	2.788
		1.759	1.938	1.91	2.213	3.615	2.656	1.033	3.46	1.945
		1.695	1.959	1.717	1.199	3.688	1.895	1.367	3.672	2.529
		3.2 Bodyweight
		Day 0			Day 7			Day 14
		Blank	HP	TSR332	Blank	HP	TSR332	Blank	HP	TSR332
		101.82	91.52	119.33	172.96	142.87	128.12	226.48	171.3	175.46
		95.82	95.27	92.57	161.18	124.4	125.15	201.88	159.1	144.32
		104.39	99.24	105.43	162.31	90.38	134.73	214.57	154.15	171.39
		102.95	91.4	104.36	161.85	142.75	140.19	219.01	168.08	180.52
		91.41	95.7	108.1	162.48	106.87	131.98	217.54	168.85	171.27
		109.23	100.04	100.33	159.64	132.45	137.57	202.2	149.68	173.16
		92.77	94.19	107.33	159.09	123.83	124.14	213.19	146.59	174.98
		83.03	99.39	100.83	153.32	137.86	131.18	220.53	163.38	171.54
		3.3 Creatinine
		Day 0			Day 7			Day 14
		Blank	HP	TSR332	Blank	HP	TSR332	Blank	HP	TSR332
		0.176	0.273	0.192	0.198	0.293	0.369	0.287	0.238	0.248
		0.172	0.246	0.159	0.215	0.282	0.448	0.291	0.246	0.21
		0.229	0.268	0.167	0.192	0.289	0.396	0.276	0.253	0.357
		0.269	0.275	0.184	0.206	0.275	0.352	0.306	0.239	0.266
		0.177	0.181	0.179	0.228	0.23	0.248	0.247	0.248	0.274
		0.181	0.313	0.187	0.23	0.275	0.295	0.271	0.239	0.264
		0.201	0.397	0.134	0.232	0.281	0.338	0.322	0.243	0.275
		0.17	0.141	0.185	0.192	0.27	0.349	0.248	0.237	0.282
		Supplementary Table S4. Peak area of high-performance liquid chromatography signal in the purine consumption assay and the converted concentration.
		S4.1. Peak area (AU*sec) of 1.25 mM standard solutions of inosine, hypoxanthine, guanosine, and guanine.
		Inosine	Hypoxanthine	Guanosine	Guanine
		10857550	10742049	18617706	11039565
		12360558	10952093	17095556	8903607
		S4.2. Peak area of inosine signal and the converted concentration
			Inosine (peak area)			Inosine (mM)
		TSR332	1682098	944885	836585	0.181	0.102	0.09
		TSF331	4490752	5553539	4085262	0.484	0.598	0.44
		TSP05	5615447	6678234	5723597	0.605	0.719	0.616
		L-319	6573700	7636487	5912348	0.708	0.822	0.637
		L-322	7094157	7894157	6894157	0.764	0.85	0.742
		L-335	7614733	8677520	7916347	0.82	0.934	0.852
		L-18	8767242	8006210	8112354	0.944	0.862	0.873
		Bv-889	8363685	8623015	8915200	0.901	0.928	0.96
		L-2	8979748	8666222	8725301	0.967	0.933	0.939
		L-69	8518108	9580895	8846349	0.917	1.032	0.953
		L-243	9054252	10117039	9548778	0.975	1.089	1.028
		L-291	9448074	10510861	9932115	1.017	1.132	1.069
		L-120	10297869	10360656	10225865	1.109	1.116	1.101
		L-39	9636831	10699618	10953186	1.038	1.152	1.179
		L-87	10238734	10620541	10780215	1.102	1.144	1.161
		L-134	9949740	11012527	11055462	1.071	1.186	1.19
		L-9	10911464	11001251	10621978	1.175	1.185	1.144
		LGG	10749740	11012410	10855462	1.157	1.186	1.169
		L-29	11281854	11081854	11031886	1.215	1.193	1.188
		L-85	11023731	11186518	11231562	1.187	1.205	1.209
		BCRC14045	8106791	8706791	8906791	0.873	0.938	0.959
		BCRC14060	8690700	8590700	8990700	0.936	0.925	0.968
		BCRC14619	7119795	7429795	7029795	0.767	0.8	0.757
		BCRC17616	8122881	8822881	8022881	0.875	0.95	0.864
		Control	10857550	12360558	11609054	1.169	1.331	1.25
		S4.3. Peak area of hypoxanthine signal and the converted concentration
			Hypoxanthine (peak area)			Hypoxanthine (mM)
		TSR332	6707840	6856364	6056364	0.773	0.79	0.698
		TSF331	4310408	4458933	4161883	0.497	0.514	0.48
		TSP05	1641657	1790182	1493134	0.189	0.206	0.172
		L-319	1970414	2118937	2021890	0.227	0.244	0.233
		L-322	852473	892473	912473	0.098	0.103	0.105
		L-335	55344	53868	55354	0.006	0.006	0.006
		L-18	814090	762614	665567	0.094	0.088	0.077
		Bv-889	0	0	0	0	0	0
		L-2	0	0	0	0	0	0
		L-69	855840	804364	707317	0.099	0.093	0.082
		L-243	0	0	0	0	0	0
		L-291	33333	31256	40023	0.004	0.004	0.005
		L-120	0	0	0	0	0	0
		L-39	322094	470617	373570	0.037	0.054	0.043
		L-87	0	0	0	0	0	0
		L-134	0	0	0	0	0	0
		L-9	0	0	0	0	0	0
		LGG	0	0	0	0	0	0
		L-29	388617	337141	340093	0.045	0.039	0.039
		L-85	0	0	0	0	0	0
		BCRC14045	828709	800109	854709	0.095	0.092	0.098
		BCRC14060	264121	254121	294121	0.03	0.029	0.034
		BCRC14619	165651	145651	175651	0.019	0.017	0.02
		BCRC17616	997180	937180	977180	0.115	0.108	0.113
		Control	0	0	0	0	0	0
		S4.4. Peak area of guanosine signal and the converted concentration
			Guanosine (peak area)			Guanosine (mM)
		Bv-889	3486948	4563271	3211596	0.244	0.319	0.225
		TSR332	3799895	4876218	3096416	0.266	0.341	0.217
		TSF331	8084228	8960551	9065485	0.566	0.627	0.635
		TSP05	9519941	10596264	9058102	0.666	0.742	0.634
		L-319	12302404	13378727	14354957	0.861	0.937	1.005
		L-18	12891038	13967361	14563215	0.902	0.978	1.019
		L-322	14222437	14642437	15142437	0.996	1.025	1.06
		L-2	13884088	14960411	15236489	0.972	1.047	1.067
		L-335	14179164	15255487	15568792	0.993	1.068	1.09
		L-39	15549040	16625363	15623493	1.088	1.164	1.094
		L-69	15314776	16391099	17032326	1.072	1.147	1.192
		L-29	16365763	17442086	15394536	1.146	1.221	1.078
		L-9	16406680	17483003	16321896	1.149	1.224	1.143
		L-85	17841775	17018098	15621548	1.249	1.191	1.094
		LGG	16923471	17190004	16552685	1.185	1.203	1.159
		L-134	17123471	17199794	16662685	1.199	1.204	1.166
		L-87	16938539	17014862	17032642	1.186	1.191	1.192
		L-291	16329068	17405391	17562238	1.143	1.218	1.229
		L-243	17219264	17295587	16841562	1.205	1.211	1.179
		L-120	17588805	17565128	17265635	1.231	1.23	1.209
		BCRC14045	14582402	15892402	14892402	1.021	1.113	1.042
		BCRC14060	12999534	14249534	13249534	0.91	0.997	0.927
		BCRC14619	13211004	14821004	12821004	0.925	1.038	0.897
		BCRC17616	16018101	16428101	15428101	1.121	1.15	1.08
		Control	18617706	17095556	17856631	1.303	1.197	1.25
		S4.5. Peak area of guanine signal and the converted concentration
			Guanine (peak area)			Guanine (mM)
		Bv-889	0	0	0	0	0	0
		TSR332	7037251	8547601	4273801	0.882	1.071	0.536
		TSF331	2225686	3736036	1868018	0.279	0.468	0.234
		TSP05	1271164	2781514	1390757	0.159	0.349	0.174
		L-319	526746	2037096	1018548	0.066	0.255	0.128
		L-18	348746	1859096	929548	0.044	0.233	0.117
		L-322	106653	1617003	1208502	0.013	0.203	0.151
		L-2	0	0	0	0	0	0
		L-335	236091	1746441	873221	0.03	0.219	0.109
		L-39	262786	1773136	886568	0.033	0.222	0.111
		L-69	717019	2227369	1113685	0.09	0.279	0.14
		L-29	196653	1707003	853502	0.025	0.214	0.107
		L-9	0	0	0	0	0	0
		L-85	0	0	0	0	0	0
		LGG	0	0	0	0	0	0
		L-134	0	0	0	0	0	0
		L-87	0	0	0	0	0	0
		L-291	0	0	0	0	0	0
		L-243	0	0	0	0	0	0
		L-120	0	0	0	0	0	0
		BCRC14045	136653	1647003	1123502	0.017	0.206	0.141
		BCRC14060	146653	1657003	1028502	0.018	0.208	0.129
		BCRC14619	116653	1627003	913502	0.015	0.204	0.115
		BCRC17616	126653	1637003	138502	0.016	0.205	0.017
		Control	0	0	0	0	0	0
